# Supplementary material for: Deciphering the role of CNIH4 in pan-cancer landscapes and its significance in breast cancer progression
Source: Front Genet. 2025 Feb 20;16:1536620. doi: 10.3389/fgene.2025.1536620 (PMC11882561; doi:10.3389/fgene.2025.1536620)
Supplement: Supplementary file 2 [file DataSheet1.xlsx]

## Sheet: Spatial transcriptome datasets
Table S1-Spatial transcriptome datasets
Number	Cancer type	Source	Samples	PMID or Link
BRCA1	Primary breast carcinoma	GEO Dataset	GSE203612-GSM6177603	35931863
BRCA2	Human Breast Cancer	10x Genomics	Human Breast Cancer (Block A Section 1)	https://www.10xgenomics.com/datasets/human-breast-cancer-block-a-section-1-1-standard-1-1-0
BRCA3	Human Breast Cancer	10x Genomics	Human Breast Cancer (Block A Section 2)	https://www.10xgenomics.com/cn/datasets/human-breast-cancer-block-a-section-2-1-standard-1-1-0
BRCA4	Human Breast Cancer: Ductal Carcinoma In Situ, Invasive Carcinoma	10x Genomics	Human Breast Cancer: Ductal Carcinoma In Situ, Invasive Carcinoma (FFPE)	https://www.10xgenomics.com/cn/datasets/human-breast-cancer-ductal-carcinoma-in-situ-invasive-carcinoma-ffpe-1-standard-1-3-0
BRCA5	Human Breast Cancer	10x Genomics	Human Breast Cancer: Visium Fresh Frozen, Whole Transcriptome	https://www.10xgenomics.com/cn/datasets/human-breast-cancer-visium-fresh-frozen-whole-transcriptome-1-standard
BRCA6	Human Breast Cancer	10x Genomics	Human Breast Cancer: Whole Transcriptome Analysis	https://www.10xgenomics.com/cn/datasets/human-breast-cancer-whole-transcriptome-analysis-1-standard-1-2-0
BRCA7	Human Breast Cancer: Invasive Ductal Carcinoma Stained With Fluorescent CD3 Antibody	10x Genomics	Invasive Ductal Carcinoma Stained With Fluorescent CD3 Antibody	https://www.10xgenomics.com/cn/datasets/invasive-ductal-carcinoma-stained-with-fluorescent-cd-3-antibody-1-standard-1-2-0
BRCA8	Triple negative breast cancer	GEO Dataset	GSE210616-GSM6433585	36283023
BRCA9	Triple negative breast cancer	GEO Dataset	GSE210616-GSM6433586	36283023
BRCA10	Triple negative breast cancer	GEO Dataset	GSE210616-GSM6433587	36283023
BRCA11	Triple negative breast cancer	GEO Dataset	GSE210616-GSM6433588	36283023
BRCA12	Triple negative breast cancer	GEO Dataset	GSE210616-GSM6433589	36283023
BRCA13	Triple negative breast cancer	GEO Dataset	GSE210616-GSM6433590	36283023
BRCA14	Triple negative breast cancer	GEO Dataset	GSE210616-GSM6433591	36283023
BRCA15	Triple negative breast cancer	GEO Dataset	GSE210616-GSM6433592	36283023
BRCA16	Triple negative breast cancer	GEO Dataset	GSE210616-GSM6433593	36283023
BRCA17	Triple negative breast cancer	GEO Dataset	GSE210616-GSM6433594	36283023
BRCA18	Triple negative breast cancer	GEO Dataset	GSE210616-GSM6433595	36283023
BRCA19	Triple negative breast cancer	GEO Dataset	GSE210616-GSM6433596	36283023
BRCA20	Triple negative breast cancer	GEO Dataset	GSE210616-GSM6433597	36283023
BRCA21	Triple negative breast cancer	GEO Dataset	GSE210616-GSM6433598	36283023
BRCA22	Triple negative breast cancer	GEO Dataset	GSE210616-GSM6433599	36283023
BRCA23	Triple negative breast cancer	GEO Dataset	GSE210616-GSM6433600	36283023
BRCA24	Triple negative breast cancer	GEO Dataset	GSE210616-GSM6433601	36283023
BRCA25	Triple negative breast cancer	GEO Dataset	GSE210616-GSM6433602	36283023
BRCA26	Triple negative breast cancer	GEO Dataset	GSE210616-GSM6433603	36283023
BRCA27	Triple negative breast cancer	GEO Dataset	GSE210616-GSM6433604	36283023
BRCA28	Triple negative breast cancer	GEO Dataset	GSE210616-GSM6433605	36283023
BRCA29	Triple negative breast cancer	GEO Dataset	GSE210616-GSM6433606	36283023
BRCA30	Triple negative breast cancer	GEO Dataset	GSE210616-GSM6433607	36283023
BRCA31	Triple negative breast cancer	GEO Dataset	GSE210616-GSM6433608	36283023
BRCA32	Triple negative breast cancer	GEO Dataset	GSE210616-GSM6433609	36283023
BRCA33	Triple negative breast cancer	GEO Dataset	GSE210616-GSM6433610	36283023
BRCA34	Triple negative breast cancer	GEO Dataset	GSE210616-GSM6433611	36283023
BRCA35	Triple negative breast cancer	GEO Dataset	GSE210616-GSM6433612	36283023
BRCA36	Triple negative breast cancer	GEO Dataset	GSE210616-GSM6433613	36283023
BRCA37	Triple negative breast cancer	GEO Dataset	GSE210616-GSM6433614	36283023
BRCA38	Triple negative breast cancer	GEO Dataset	GSE210616-GSM6433615	36283023
BRCA39	Triple negative breast cancer	GEO Dataset	GSE210616-GSM6433616	36283023
BRCA40	Triple negative breast cancer	GEO Dataset	GSE210616-GSM6433617	36283023
BRCA41	Triple negative breast cancer	GEO Dataset	GSE210616-GSM6433618	36283023
BRCA42	Triple negative breast cancer	GEO Dataset	GSE210616-GSM6433619	36283023
BRCA43	Triple negative breast cancer	GEO Dataset	GSE210616-GSM6433620	36283023
BRCA44	Triple negative breast cancer	GEO Dataset	GSE210616-GSM6433621	36283023
BRCA45	Triple negative breast cancer	GEO Dataset	GSE210616-GSM6433622	36283023
BRCA46	Triple negative breast cancer	GEO Dataset	GSE210616-GSM6433623	36283023
BRCA47	Triple negative breast cancer	GEO Dataset	GSE210616-GSM6433624	36283023
BRCA48	Triple negative breast cancer	GEO Dataset	GSE210616-GSM6433625	36283023
BRCA49	Triple negative breast cancer	GEO Dataset	GSE210616-GSM6433626	36283023
BRCA50	Triple negative breast cancer	GEO Dataset	GSE210616-GSM6433627	36283023

## Sheet: Abbreviations
Table S2-Abbreviations
Cancer type	Description		ID	Description
ACC	Adrenocortical carcinoma		CNIH4	Cornichon family AMPA receptor auxiliary protein 4
BLCA	Bladder Urothelial Carcinoma		AFP	Alpha-fetoprotein
BRCA	Breast invasive carcinoma		GPCR	G protein-coupled receptor
CESC	Cervical squamous cell carcinoma and endocervical adenocarcinoma		GTEx	Genotype-Tissue Expression
CHOL	Cholangiocarcinoma		HPA	Human Protein Atlas
COAD	Colon adenocarcinoma		GDC	Genomic Data Commons
DLBC	Lymphoid Neoplasm Diffuse Large B-cell Lymphoma		CNV	Copy number variation
ESCA	Esophageal carcinoma		TCGA	The Cancer Genome Atlas
GBM	Glioblastoma multiforme		TMB	Tumor mutation burden
HNSC	Head and Neck squamous cell carcinoma		MSI	Microsatellite instability
KICH	Kidney Chromophobe		LOH	Loss of heterozygosity
KIRC	Kidney renal clear cell carcinoma		HRD	Homologous recombination deficiency
KIRP	Kidney renal papillary cell carcinoma		GWAS	Genome-wide association study
LAML	Acute Myeloid Leukemia		TCPA	The Cancer Proteome Atlas
LGG	Brain Lower Grade Glioma		TIMER2.0	Tumor Immune Estimation Resource 2.0
LIHC	Liver hepatocellular carcinoma		TIP	Tracking Tumor Immunophenotype
LUAD	Lung adenocarcinoma		TISCH2	Tumor Immune Single-cell Hub 2
LUSC	Lung squamous cell carcinoma		GENT2	Gene Expression database of Normal and Tumor tissues 2
MESO	Mesothelioma		PSI	Percent spliced-in
OV	Ovarian serous cystadenocarcinoma		eQTL-GWAS	Expression Quantitative Trait Loci-Genome-Wide Association Study
PAAD	Pancreatic adenocarcinoma		ROC	Receiver operating characteristic
PCPG	Pheochromocytoma and Paraganglioma		KM	Kaplan-Meier
PRAD	Prostate adenocarcinoma		OS	Overall survival
READ	Rectum adenocarcinoma		DSS	Disease-specific survival
SARC	Sarcoma		PFI	Progression-free interval
SKCM	Skin Cutaneous Melanoma		DFI	Disease-free interval
STAD	Stomach adenocarcinoma		RCS	Restricted cubic spline
TGCT	Testicular Germ Cell Tumors		log2FC	log2 fold change
THCA	Thyroid carcinoma		NES	Normalized enrichment scores
THYM	Thymoma		IC50	The half-inhibitory concentration
UCEC	Uterine Corpus Endometrial Carcinoma		CMap	Connectivity Map
UCS	Uterine Carcinosarcoma		XSum	eXtreme Sum
UVM	Uveal Melanoma		DMEM	Dulbecco's Modified Eagle Medium
			FBS	Fetal bovine serum
			RPMI-1640	Roswell Park Memorial Institute 1640 Medium
			GAPDH	Glyceraldehyde 3-phosphate dehydrogenase
			ECL	Enhanced chemiluminescence
			RTK	Receptor Tyrosine Kinase
			TNBC	Triple-negative breast cancer
			SNP	Single nucleotide polymorphism
			UMAP	Uniform Manifold Approximation and Projection
			CTRP	Cancer Therapeutics Response Portal
			PRISM	Profiling Relative Inhibition Simultaneously in Mixtures

## Sheet: AS events
Table S3-AS events
Gene_Symbol	Splice_Type	Splice_Event	Project
CNIH4	AA	CNIH4_AA_9954	SpliceSeq
CNIH4	AA	CNIH4_AA_9956	SpliceSeq
CNIH4	ES	CNIH4_ES_9955	SpliceSeq
CNIH4	ES	CNIH4_ES_9957	SpliceSeq
CNIH4	A3	CNIH4_ES_9958	SpIAdder
CNIH4	A3	alt_3prime_11807	SpIAdder
CNIH4	A3	alt_3prime_11810	SpIAdder
CNIH4	A3	alt_3prime_11813	SpIAdder
CNIH4	A3	alt_3prime_11816	SpIAdder
CNIH4	A3	alt_3prime_11817	SpIAdder
CNIH4	A3	alt_3prime_11818	SpIAdder
CNIH4	A5	alt_5prime_9697	SpIAdder
CNIH4	A5	alt_5prime_9698	SpIAdder
CNIH4	A5	alt_5prime_9701	SpIAdder
CNIH4	A5	alt_5prime_9704	SpIAdder
CNIH4	A5	alt_5prime_9705	SpIAdder
CNIH4	A5	alt_5prime_9706	SpIAdder
CNIH4	ES	exon_skip_18386	SpIAdder
CNIH4	ES	exon_skip_18396	SpIAdder
CNIH4	ES	exon_skip_18397	SpIAdder
CNIH4	ES	exon_skip_18400	SpIAdder
CNIH4	ES	exon_skip_18406	SpIAdder
CNIH4	ES	exon_skip_18407	SpIAdder
CNIH4	ES	exon_skip_18408	SpIAdder
CNIH4	ES	exon_skip_18411	SpIAdder
CNIH4	ME	mutex_exons_4110	SpIAdder
CNIH4	ME	mutex_exons_4114	SpIAdder
CNIH4	ME	mutex_exons_4115	SpIAdder
CNIH4	ME	mutex_exons_4116	SpIAdder
CNIH4	ME	mutex_exons_4117	SpIAdder
CNIH4	ME	mutex_exons_4118	SpIAdder
CNIH4	ME	mutex_exons_4119	SpIAdder
CNIH4	ME	mutex_exons_4120	SpIAdder
CNIH4	ME	mutex_exons_4121	SpIAdder
CNIH4	ME	mutex_exons_4122	SpIAdder
CNIH4	ME	mutex_exons_4123	SpIAdder
